# Supplementary material for: Enhancing the capacity of Mn-rich cathodes by kinetics control for lithium-ion batteries
Source: Royal Society of Chemistry journal article supplement (doi:10.1039/d4ra06047d), 2024-01-01
Supplement: d4ra06047d1.pdf [file d4ra06047d1.pdf]

## Supplementary Information

### Enhancing Capacity in Mn-rich Cathode by Kinetics Control for Lithium-ion Batteries

Jue Wu<sup>1\*</sup>, Weiping Gao<sup>1</sup>, Qiling Wen<sup>1</sup>, Zhipeng Zhuang<sup>1</sup>, Liangkui Zhu<sup>2</sup>

<sup>1</sup> School of Life Sciences, Zhuhai College of Science and Technology, Zhuhai

519041, China

<sup>2</sup>State Key Laboratory of Inorganic Synthesis & Preparative Chemistry, Jilin

University, Changchun 130012, China

E-mail: [jwu@zcst.edu.cn](mailto:jwu@zcst.edu.cn)

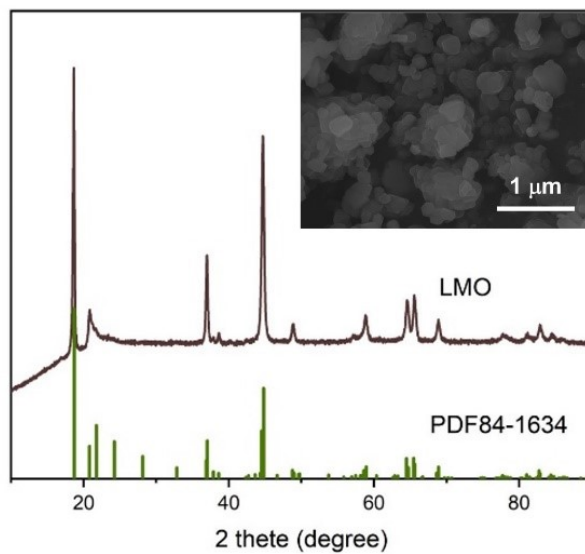

**Figure S1** XRD patterns of LMO material. Histogram: PDF patterns for  $\text{Li}_2\text{MnO}_3$  (PDF84-1634). Insert: SEM image of LMO material.

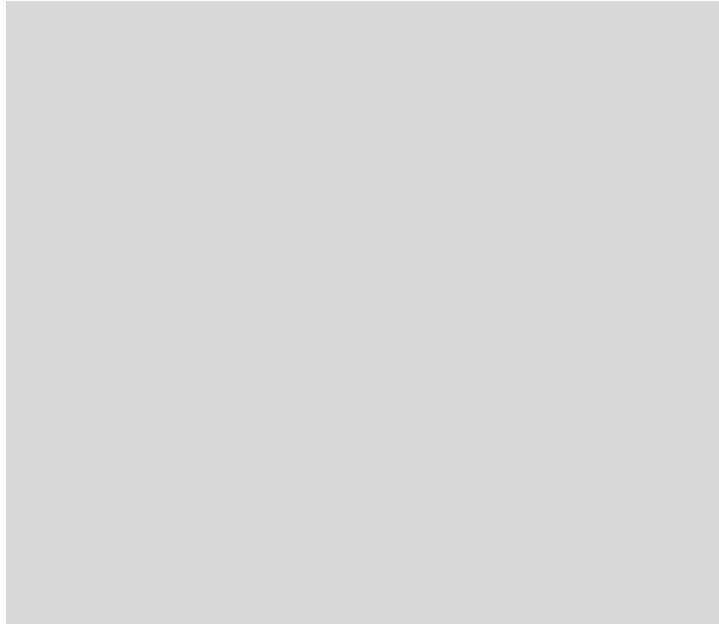

**Figure S2** XRD patterns of LMO series materials.

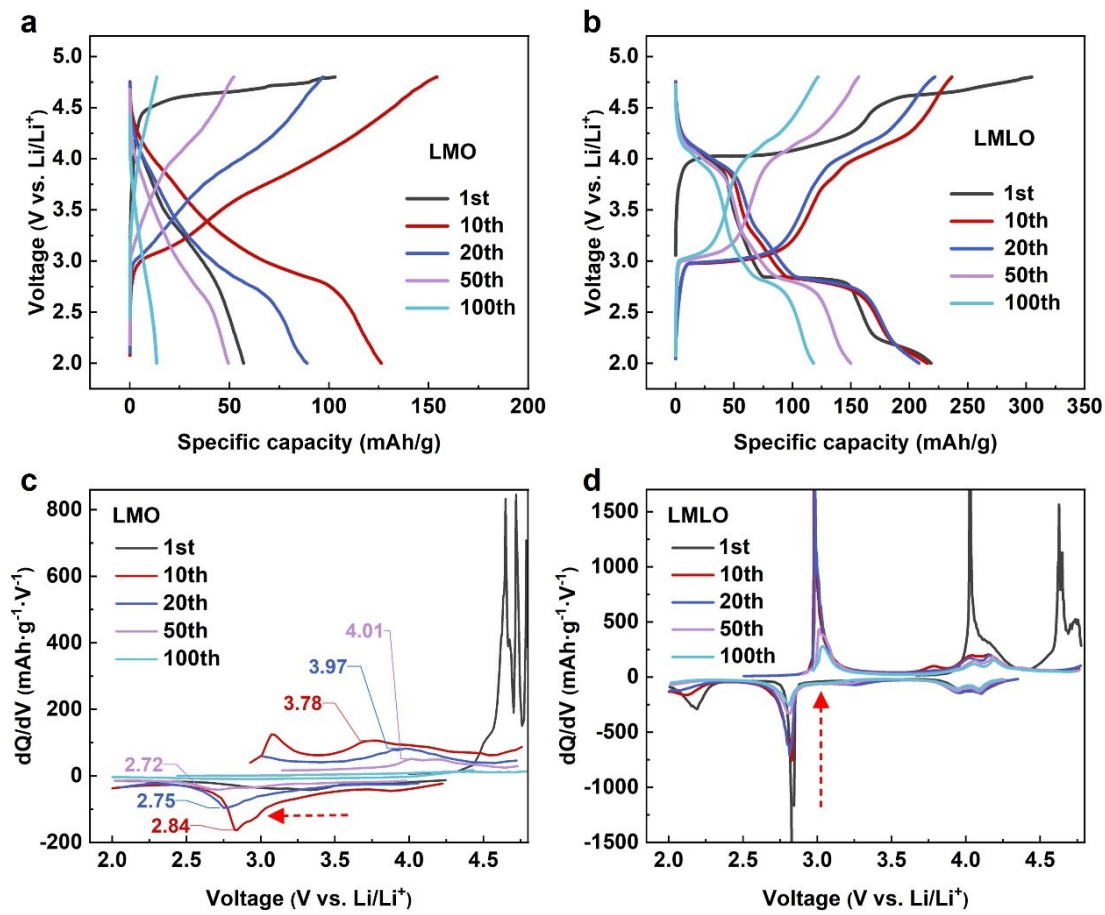

**Figure S3 (a, b)** The charge-discharge curves, and **(c, d)** corresponding dQ/dV curves for LMO and LMLO electrodes at the 1st, 10th, 20th, 50th, and 100th cycle.

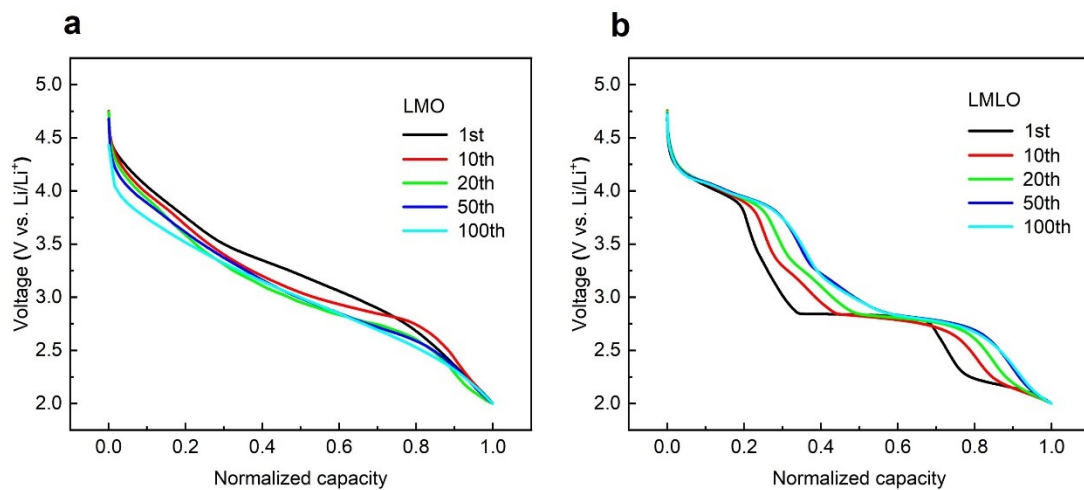

**Figure S4** The normalized charge-discharge profiles for (a) LMO, and (b) LMLO materials.

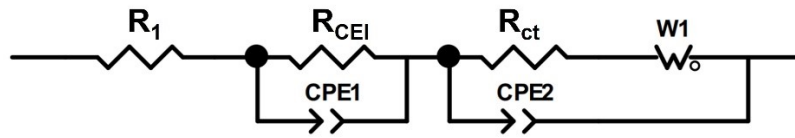

**Figure S5** The equivalent circuit for EIS data.

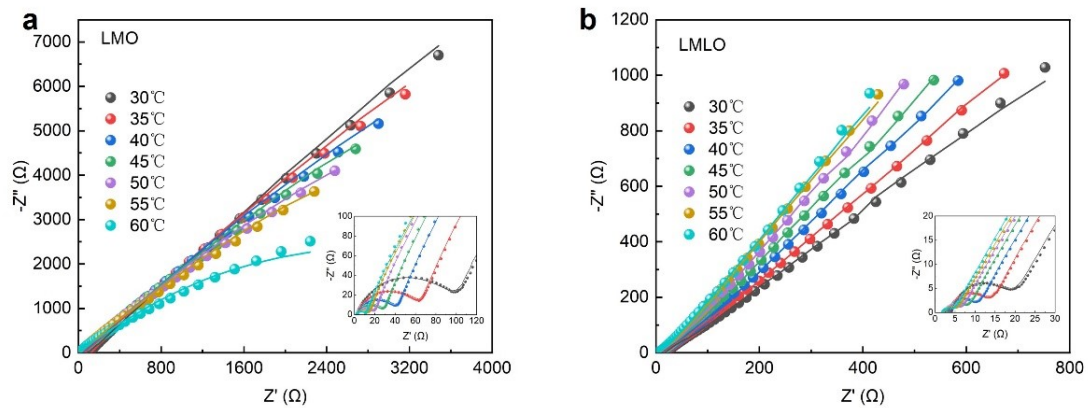

**Figure S6** The variable temperature EIS data for **(a)** LMO, and **(b)** LMLO.

**Table S1** SEM-EDS quantity analysis table weight fraction of La0.01, La0.03, La0.05 and LMLO.

| Material | Atomic ratio of Mn : La |
|----------|-------------------------|
| La0.01   | 99.02 : 1.01            |
| La0.03   | 97.01 : 3.02            |
| La0.05   | 95.02 : 5.02            |
| LMLO     | 196.95 : 3.03           |



**Table S2** Rietveld refined crystallographic parameters of LMO material by the XRD patterns.

| Material | phase                            | $a$ (Å) | $b$ (Å) | $c$ (Å) | $\alpha$ (°) | $\beta$ (°) | $\gamma$ (°) | $V$ (Å <sup>3</sup> ) |
|----------|----------------------------------|---------|---------|---------|--------------|-------------|--------------|-----------------------|
| LMO      | Li <sub>2</sub> MnO <sub>3</sub> | 4.9276  | 8.5132  | 5.0132  | 90.000       | 108.812     | 90.000       | 199.069               |

**Table S3** Atoms occupancy of LMO material from Rietveld refinement by the XRD patterns.

| Material | Phase                            | Atom | Site | x       | y       | z       | Occ.  |
|----------|----------------------------------|------|------|---------|---------|---------|-------|
| LMO      | Li <sub>2</sub> MnO <sub>3</sub> | Mn1  | 4g   | 0.00000 | 0.17346 | 0.00000 | 1.000 |
|          |                                  | Li1  | 2b   | 0.00000 | 0.50000 | 0.00000 | 1.000 |
|          |                                  | Li2  | 2c   | 0.00000 | 0.00000 | 0.50000 | 1.000 |
|          |                                  | Li3  | 4h   | 0.00000 | 0.72850 | 0.50000 | 1.000 |
|          |                                  | O1   | 4i   | 0.23990 | 0.00000 | 0.21169 | 1.000 |
|          |                                  | O2   | 8j   | 0.25960 | 0.33724 | 0.23159 | 1.000 |

**Table S4** Fitting results of EIS at varied temperatures for LMO and LMLO electrodes.

| Sample | Temperature (°C) | $R_{ct}$ ( $\Omega$ ) |
|--------|------------------|-----------------------|
| LMO    | 30.0             | $2.842 \times 10^5$   |
|        | 35.0             | $9.624 \times 10^4$   |
|        | 40.0             | $5.317 \times 10^4$   |
|        | 45.0             | $3.583 \times 10^4$   |
|        | 50.0             | $2.524 \times 10^4$   |
|        | 55.0             | $1.888 \times 10^4$   |
|        | 60.0             | $7.232 \times 10^3$   |
| LMLO   | 30.0             | 138.2                 |
|        | 35.0             | 120.0                 |
|        | 40.0             | 84.31                 |
|        | 45.0             | 68.45                 |
|        | 50.0             | 39.26                 |
|        | 55.0             | 32.11                 |
|        | 60.0             | 26.50                 |

**Note S1** The calculation formula for  $E_a$  value from varied temperature EIS data.

$$\log \frac{1}{R_{ct}} = -\frac{E_a}{2.303RT} + z$$
